# Supplementary material for: Circular RNA MCTP2 inhibits cisplatin resistance in gastric cancer by miR-99a-5p-mediated induction of MTMR3 expression
Source: PubMed Central journal article supplement (PMC7670601; doi:10.1186/s13046-020-01758-w), 2020-11-17
Supplement: 13046_2020_1758_MOESM1_ESM.pdf [file 13046_2020_1758_MOESM1_ESM.pdf]

**Additional file 1: Table S1**

|                                      |                          |
|--------------------------------------|--------------------------|
| hsa_circ_0000657 (circMCTP2)-Forward | ACCAGAAGAGCCAGAGGAGTC    |
| hsa_circ_0000657 (circMCTP2)-Reverse | TGGCCTGGTCCGCTGTTTTAA    |
| hsa_circ_0000659-Forward             | GCGGCAGATTTCTCAGTCCTC    |
| hsa_circ_0000659-Reverse             | CCCGTTCCAGAGTTGGTTCTT    |
| hsa_circ_0037012-Forward             | CCGTCTGATGTTCAAAGGAATC   |
| hsa_circ_0037012-Reverse             | GCTATTTCTCCAAGACGTTTTG   |
| hsa_circ_0008591-Forward             | CATCTGCTACATCCTAGCCGAA   |
| hsa_circ_0008591-Reverse             | GTCACTGTCCGGTAATCAACCTC  |
| hsa_circ_0082374-Forward             | ATTTGTACAGCATCTGGTGTGTGC |
| hsa_circ_0082374-Reverse             | GTCTTCCTCCATAATCGGTTTGAA |
| hsa_circ_0067047-Forward             | TCGTCATGGTCCTGGAGATAGC   |
| hsa_circ_0067047-Reverse             | TAATCAACCTCGGGCTCCTTCT   |
| miR-99a-5p-Forward                   | AACCCGTAGATCCGATCTTGTG   |
| miR-324-5p-Forward                   | CGCATCCCCTAGGGCATTGGTG   |
| miR-485-5p-Forward                   | AGAGGCTGGCCGTGATGAATTC   |
| miR-149-5p-Forward                   | TCTGGCTCCGTGTCTTCACTCCC  |
| miR-708-5p-Forward                   | AAGGAGCTTACAATCTAGCTGGG  |
| miR-452-5p-Forward                   | AACTGTTTGCAGAGGAACTGA    |
| miR-188-5p-Forward                   | CATCCCTTGCATGGTGGAGGG    |
| miR-1285-3p-Forward                  | TCTGGGCAACAAAGTGAGACCT   |
| Universal 5' primer                  | GCGAGCACAGAATTAATACGAC   |
| MCTP2-Forward                        | CAGATCTACGGGCAAGGCAT     |
| MCTP2-Reverse                        | GCACCGAGGTGTAGGAAGAC     |
| MTMR3-Forward                        | AGCAGAGTGGGCTCAGTGTT     |
| MTMR3-Reverse                        | ACTGTCCACGTTTGGTCCTC     |
| $\beta$ -actin-Forward               | CTCCATCCTGGCCTCGCTGT     |
| $\beta$ -actin-Reverse               | GCTGTACCTTCACCGTTCC      |
| U6-Forward                           | CTCGCTTCGGCAGCACA        |
| U6-Reverse                           | AACGCTTCACGAATTTGCGT     |
