# Supplementary material for: Circular RNA MCTP2 inhibits cisplatin resistance in gastric cancer by miR-99a-5p-mediated induction of MTMR3 expression
Source: PubMed Central journal article supplement (PMC7670601; doi:10.1186/s13046-020-01758-w), 2020-11-17

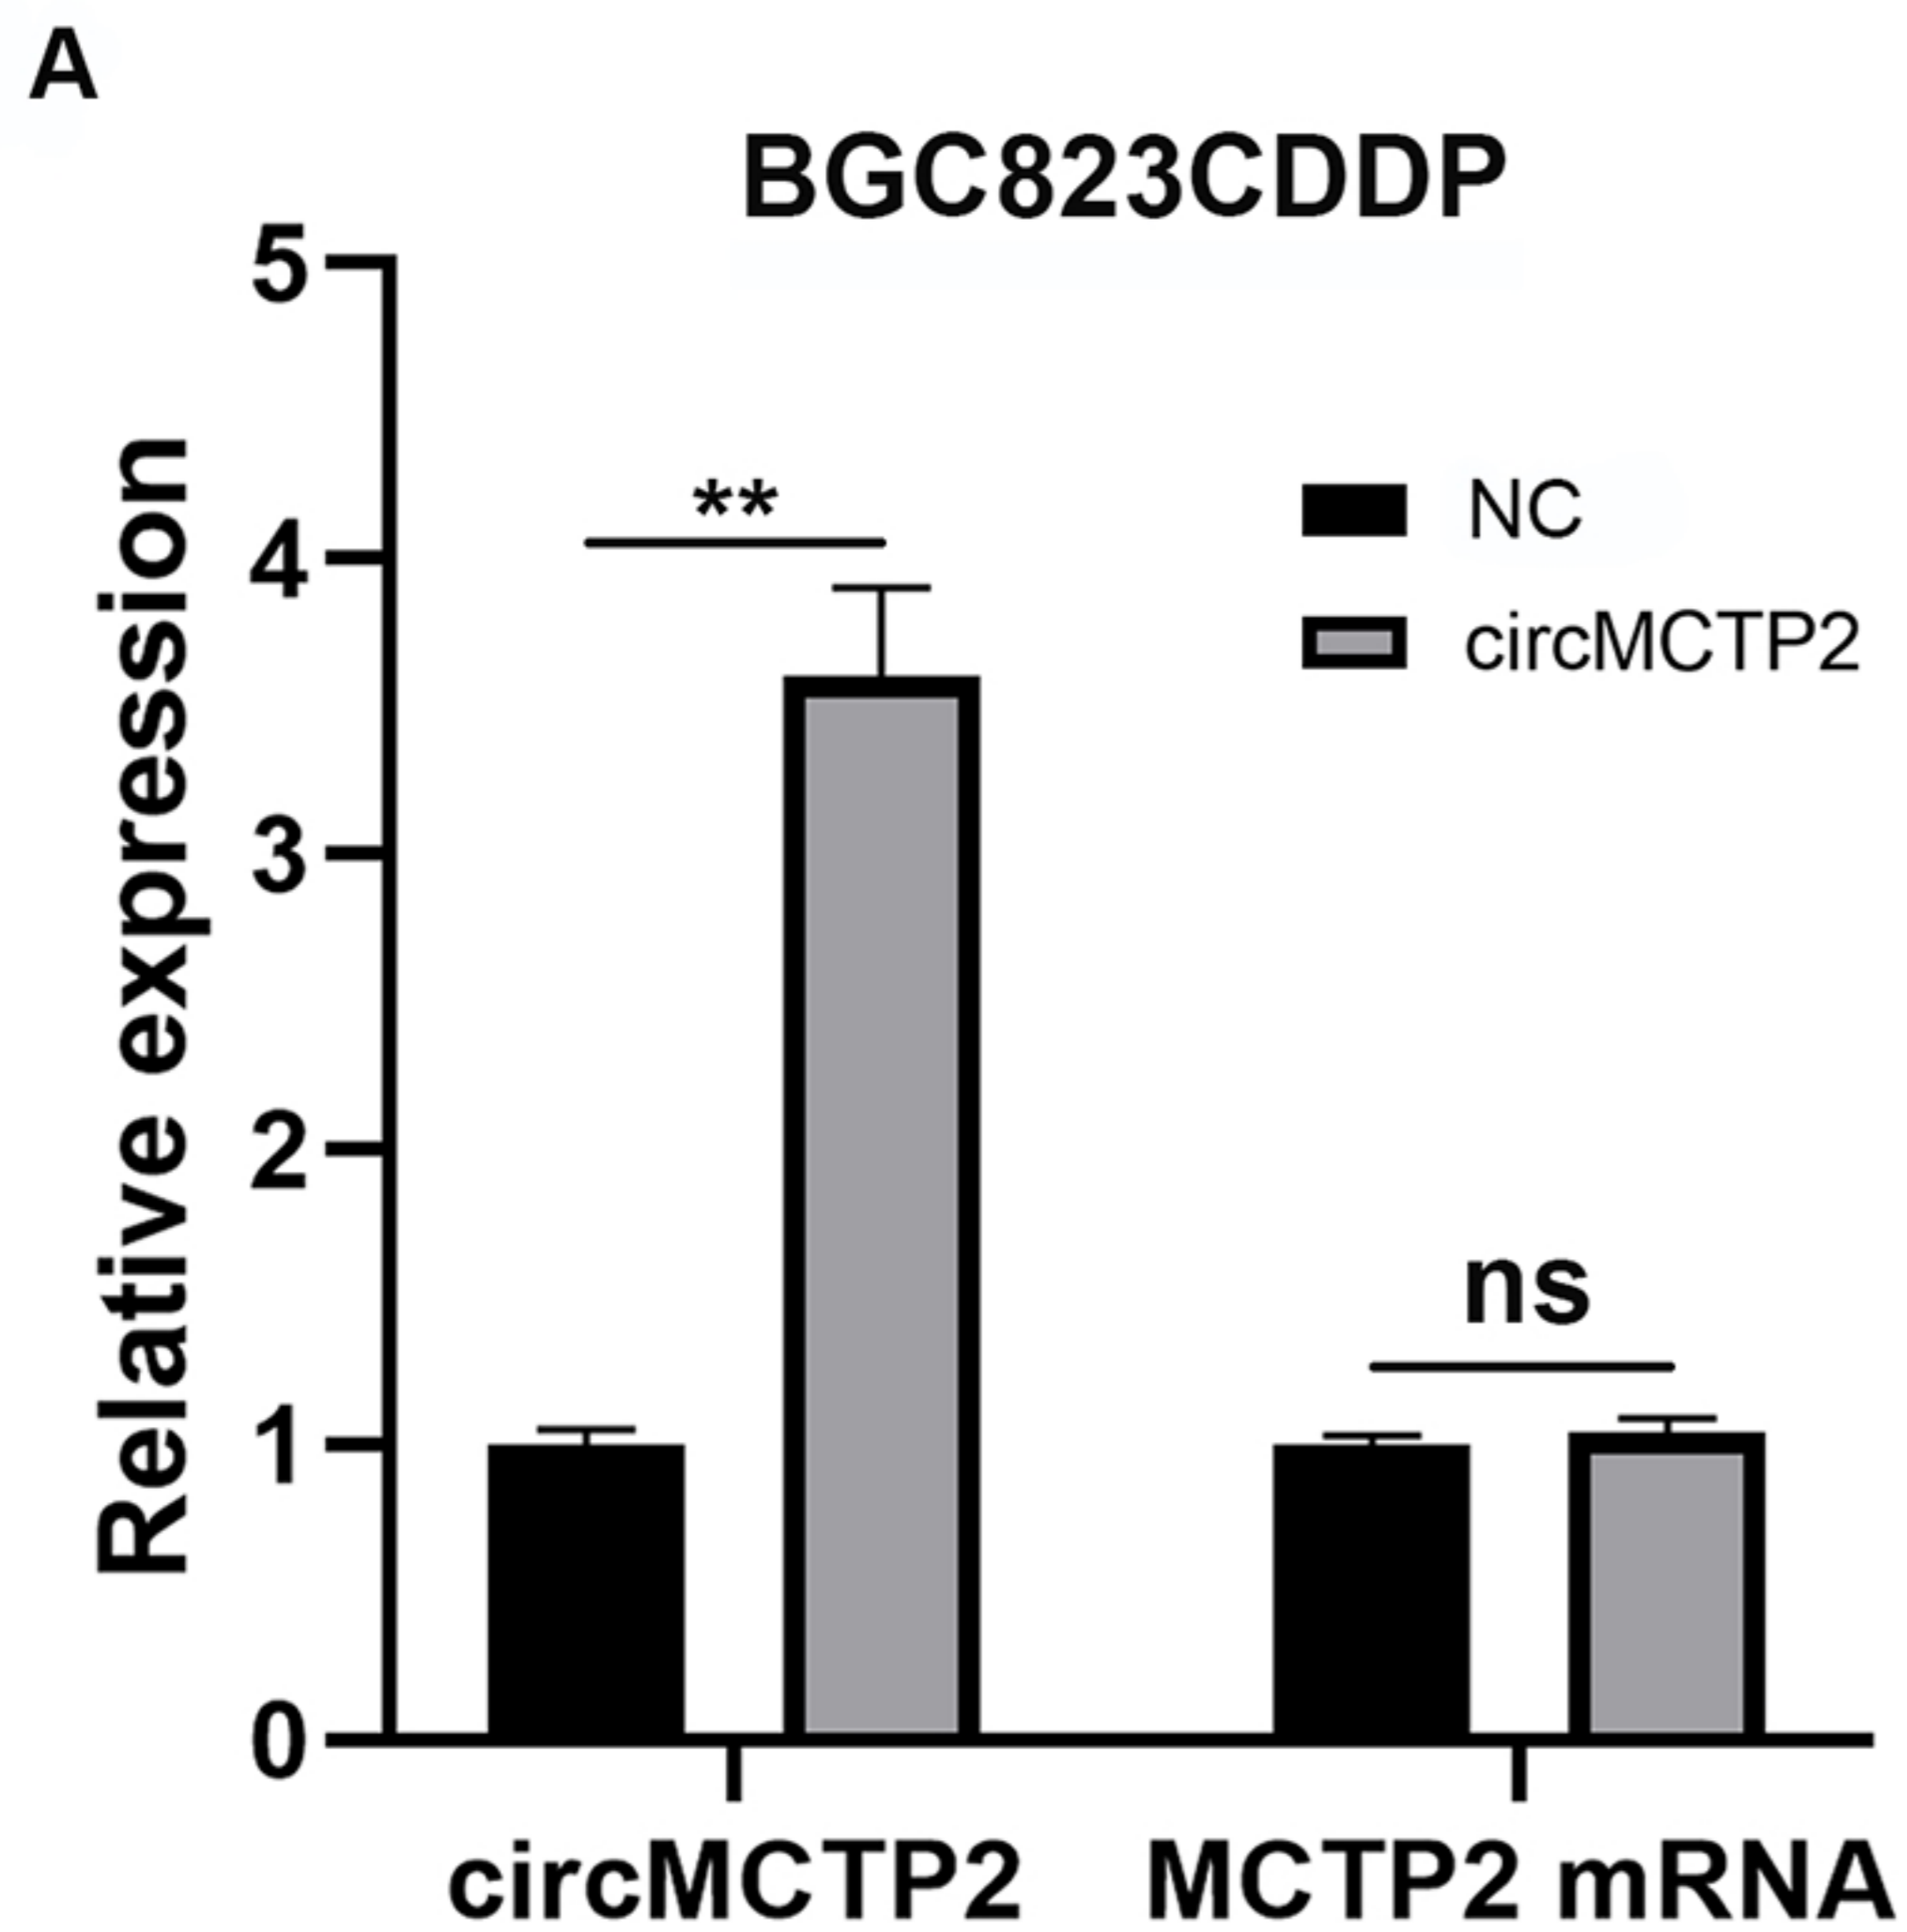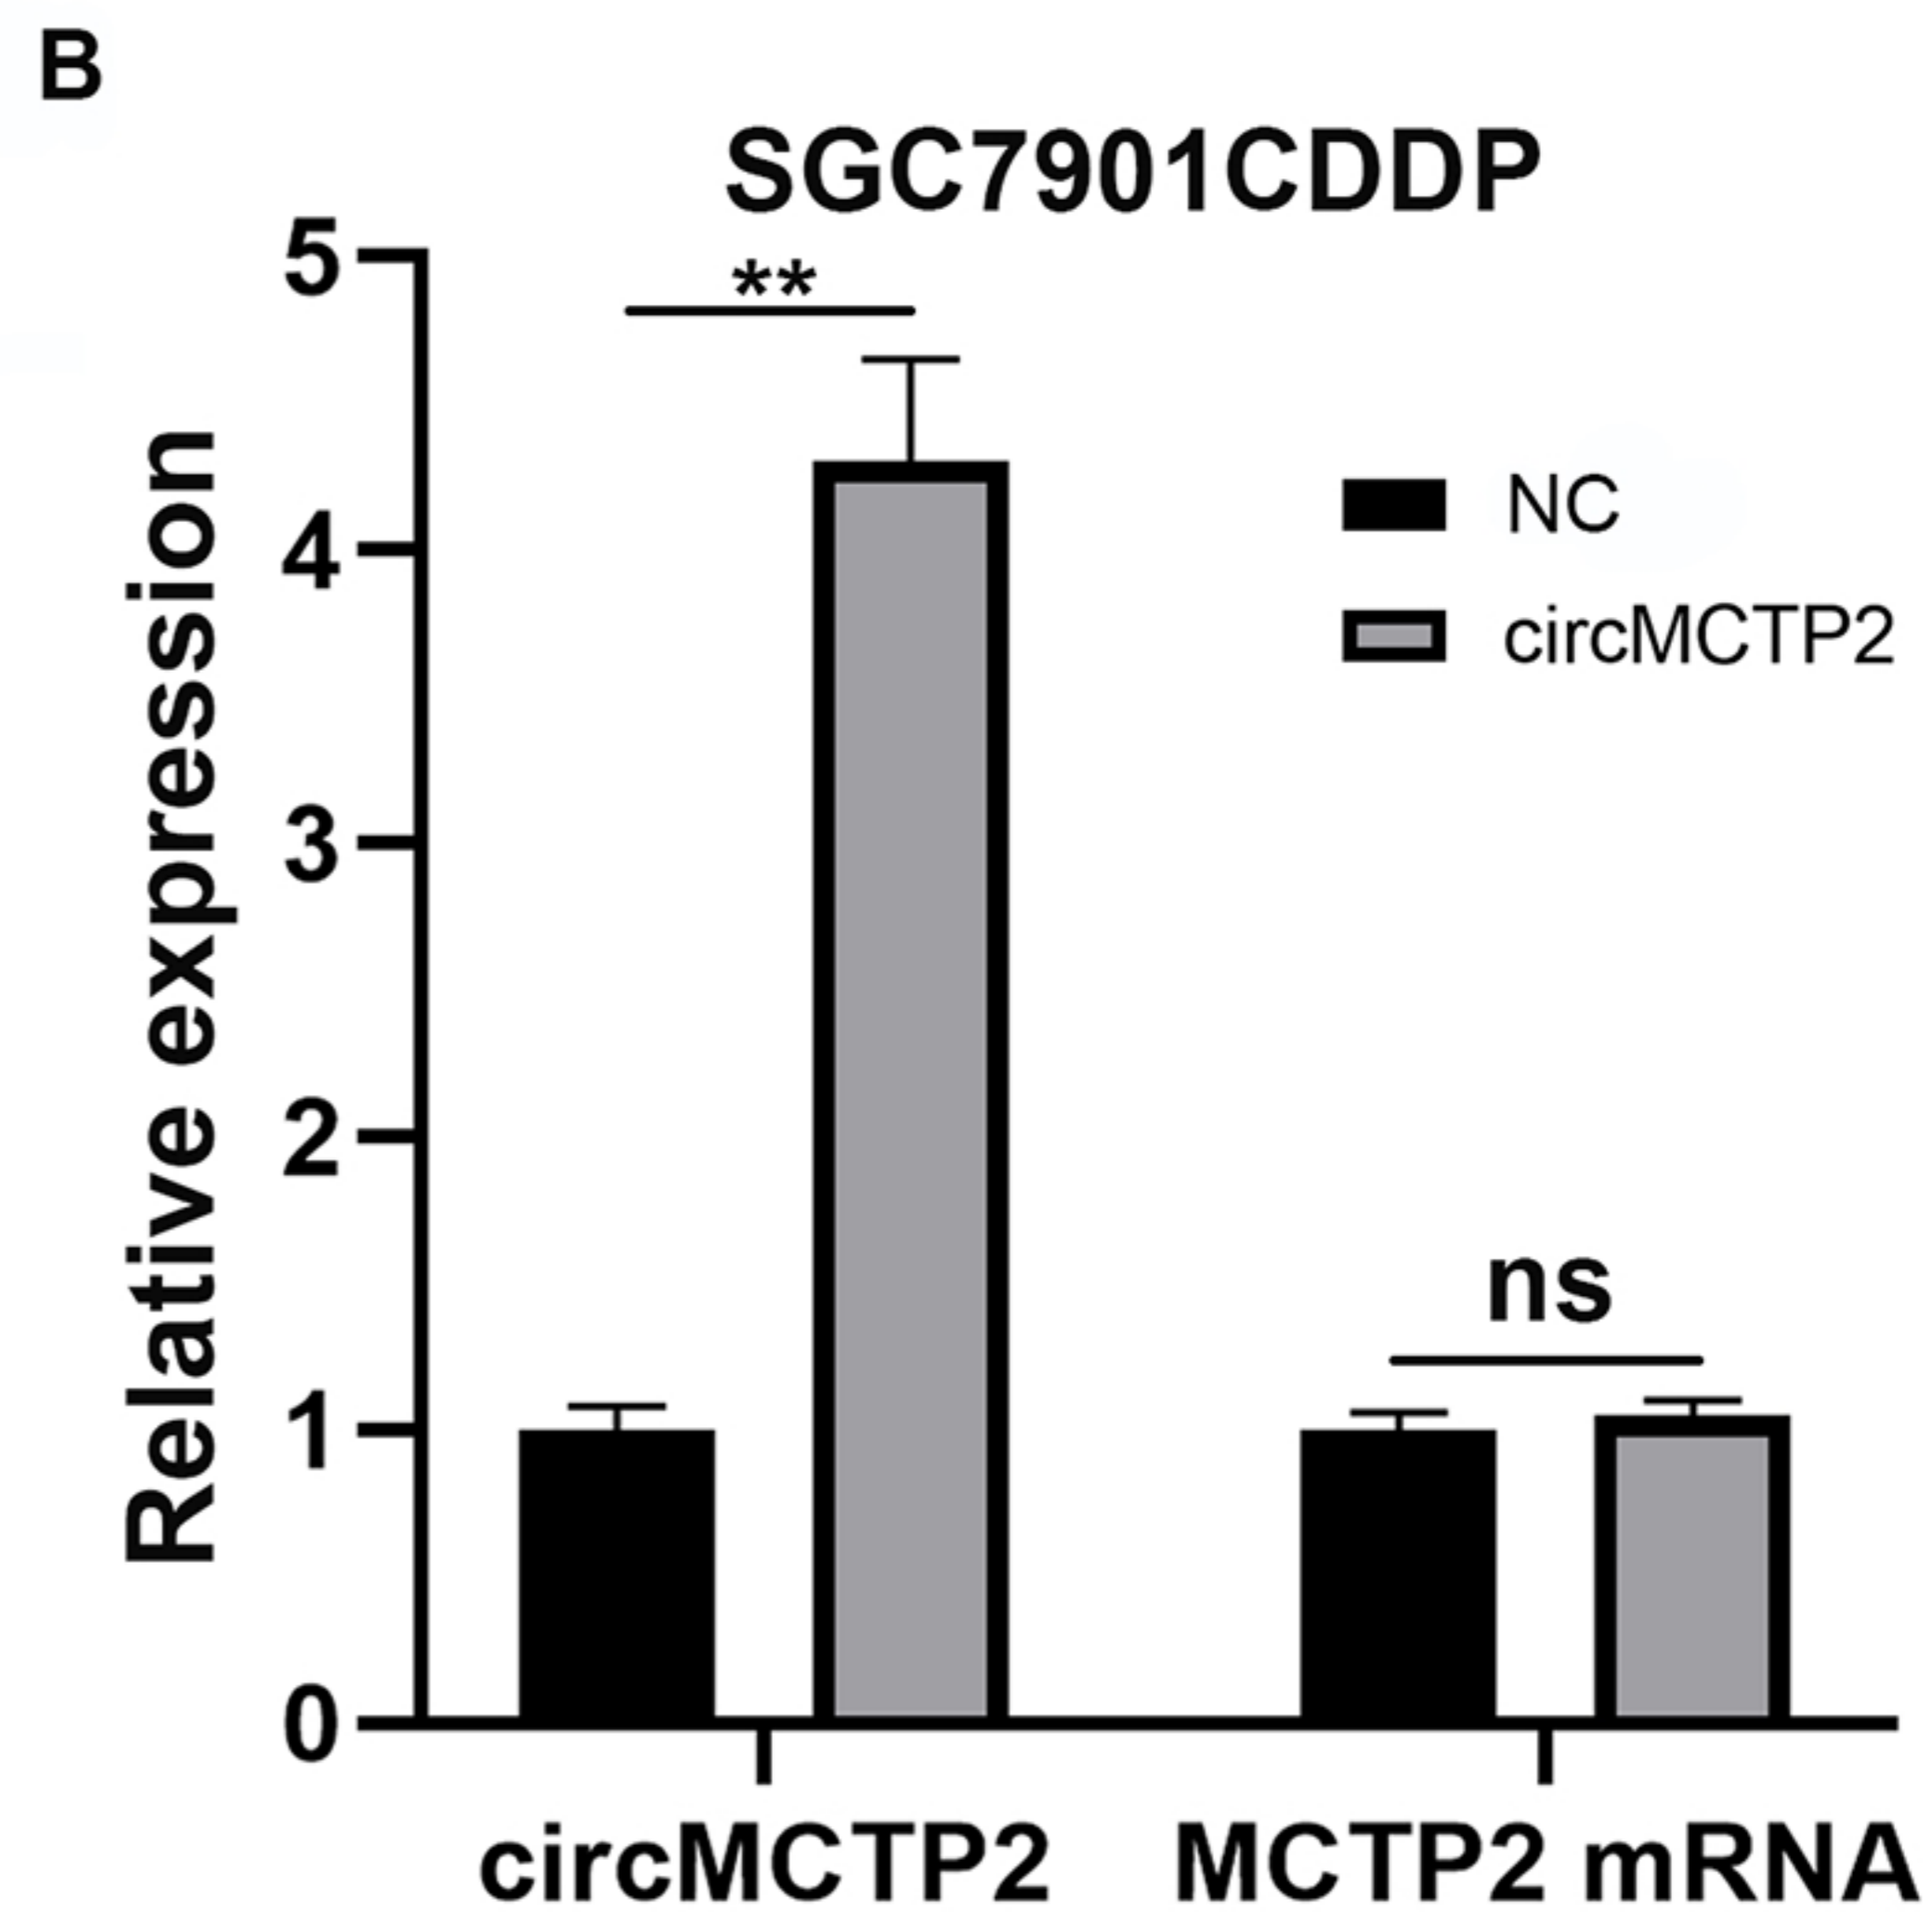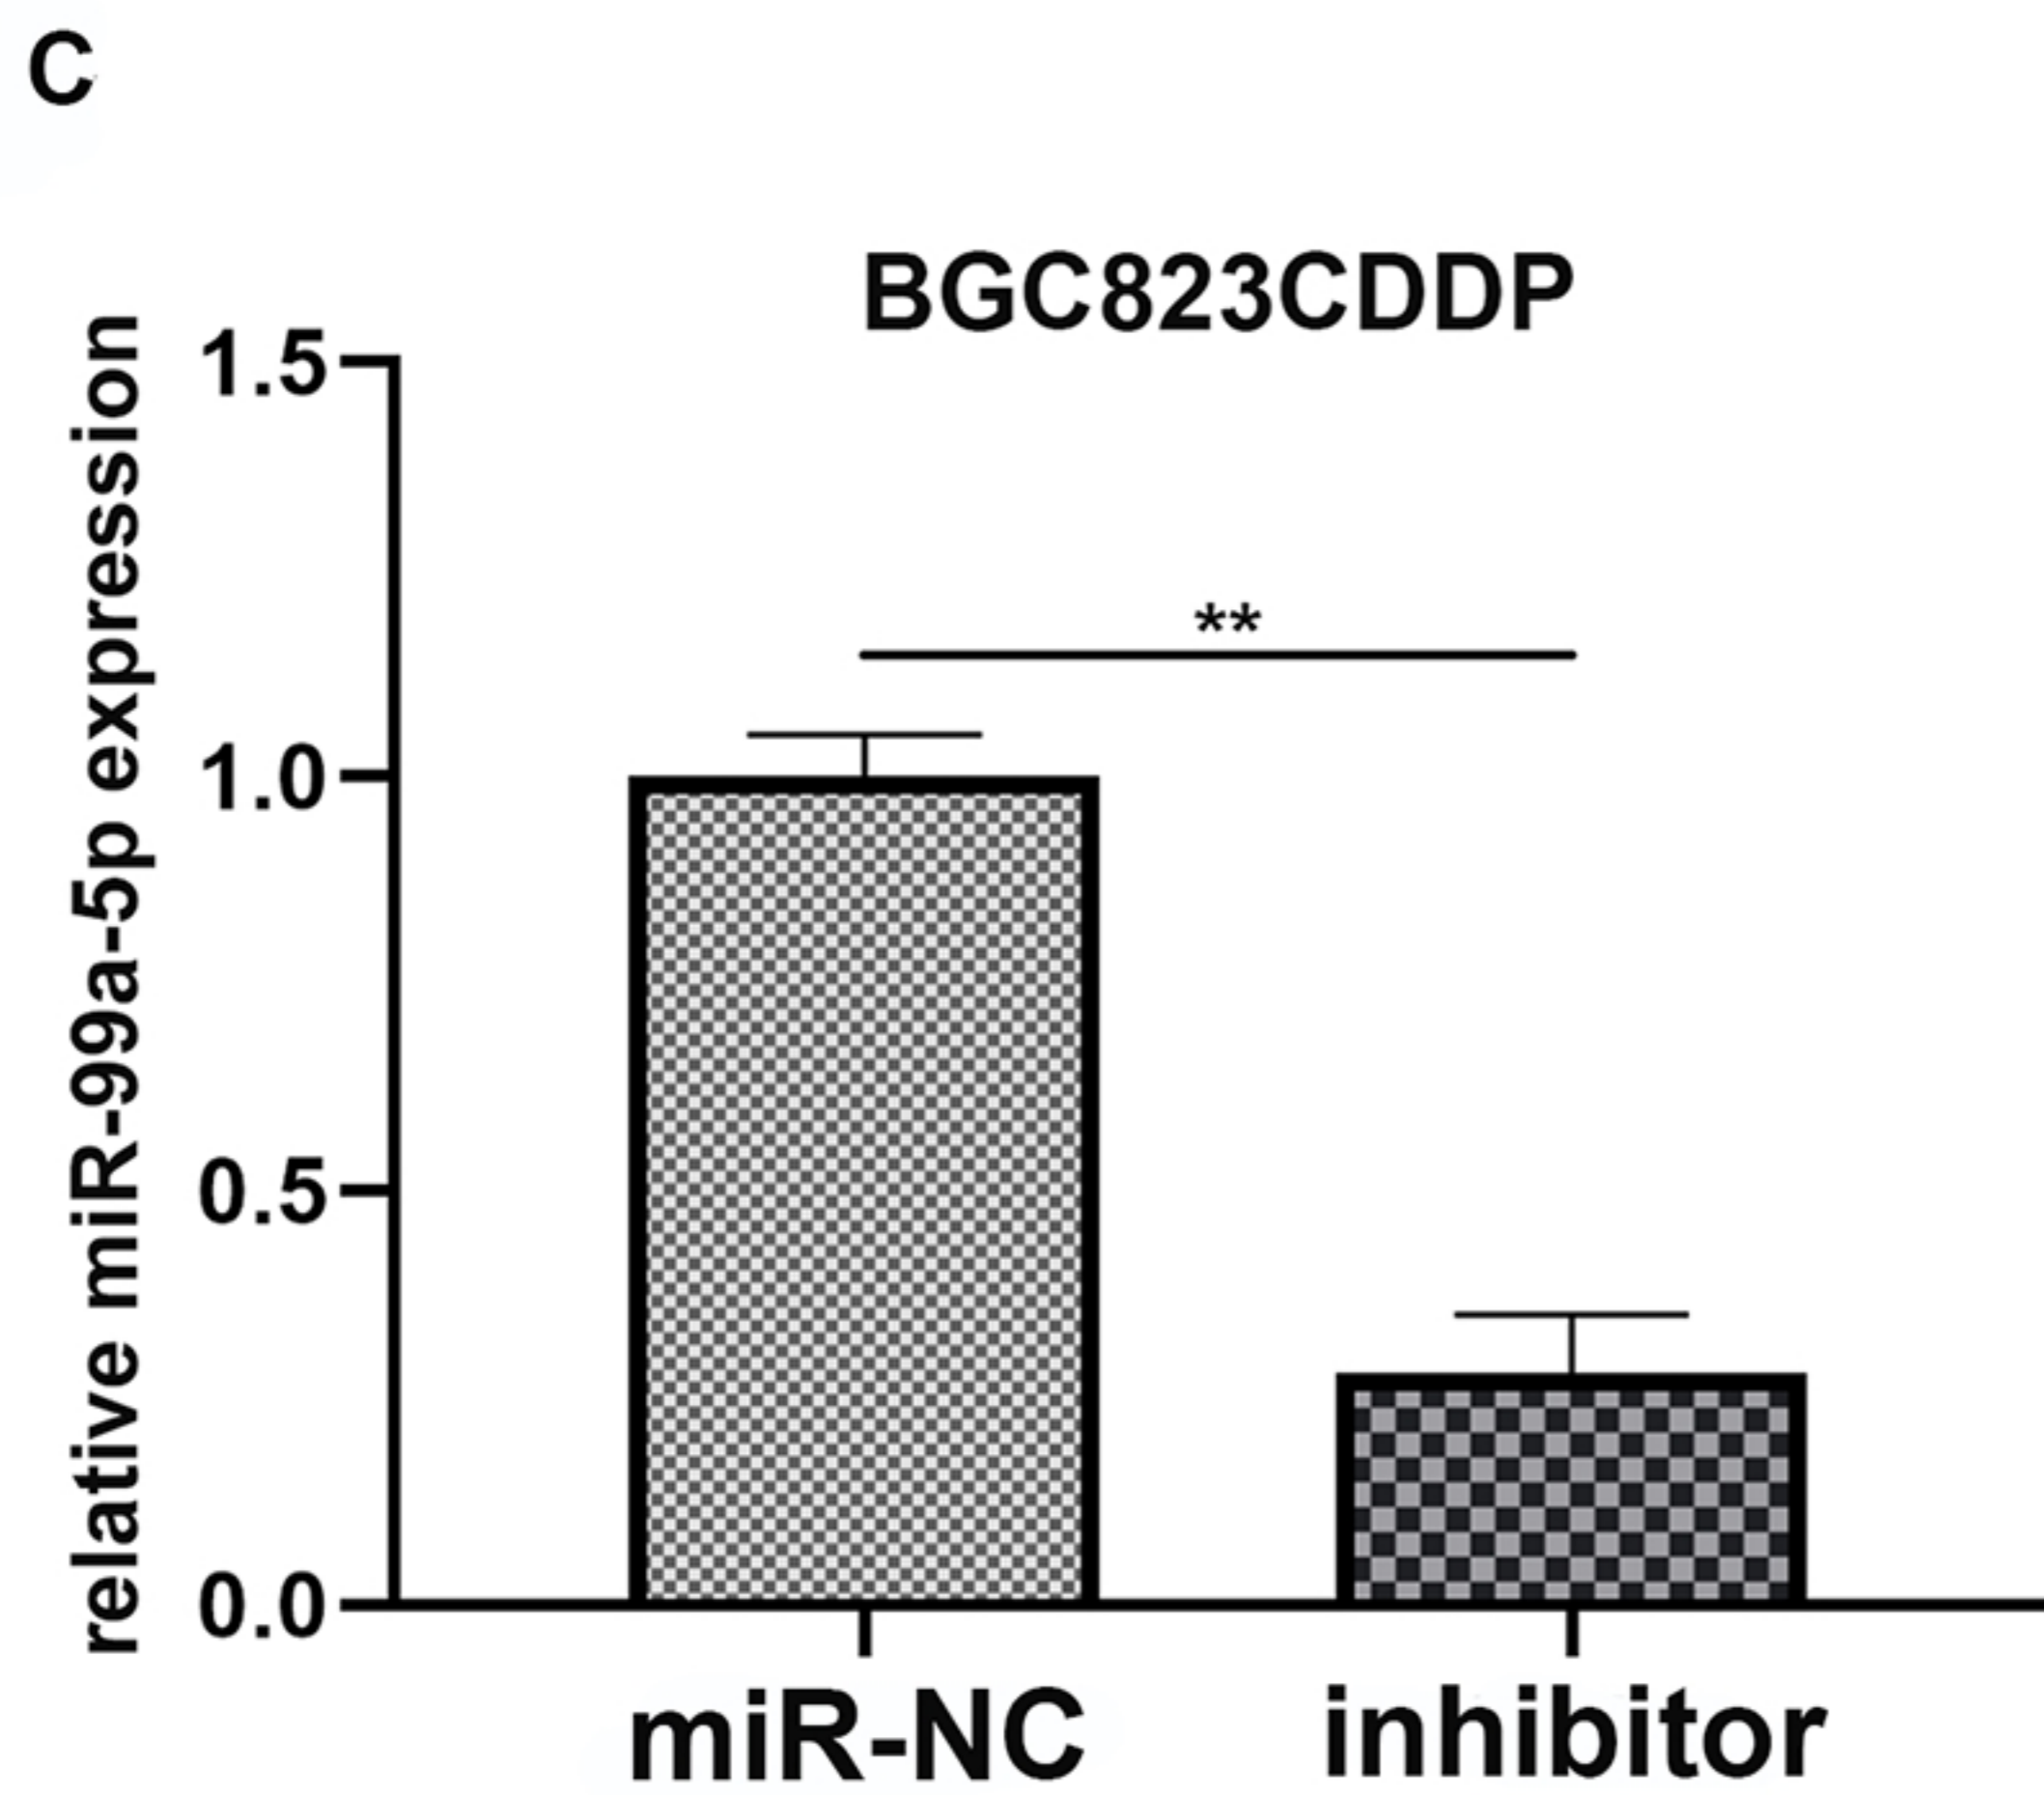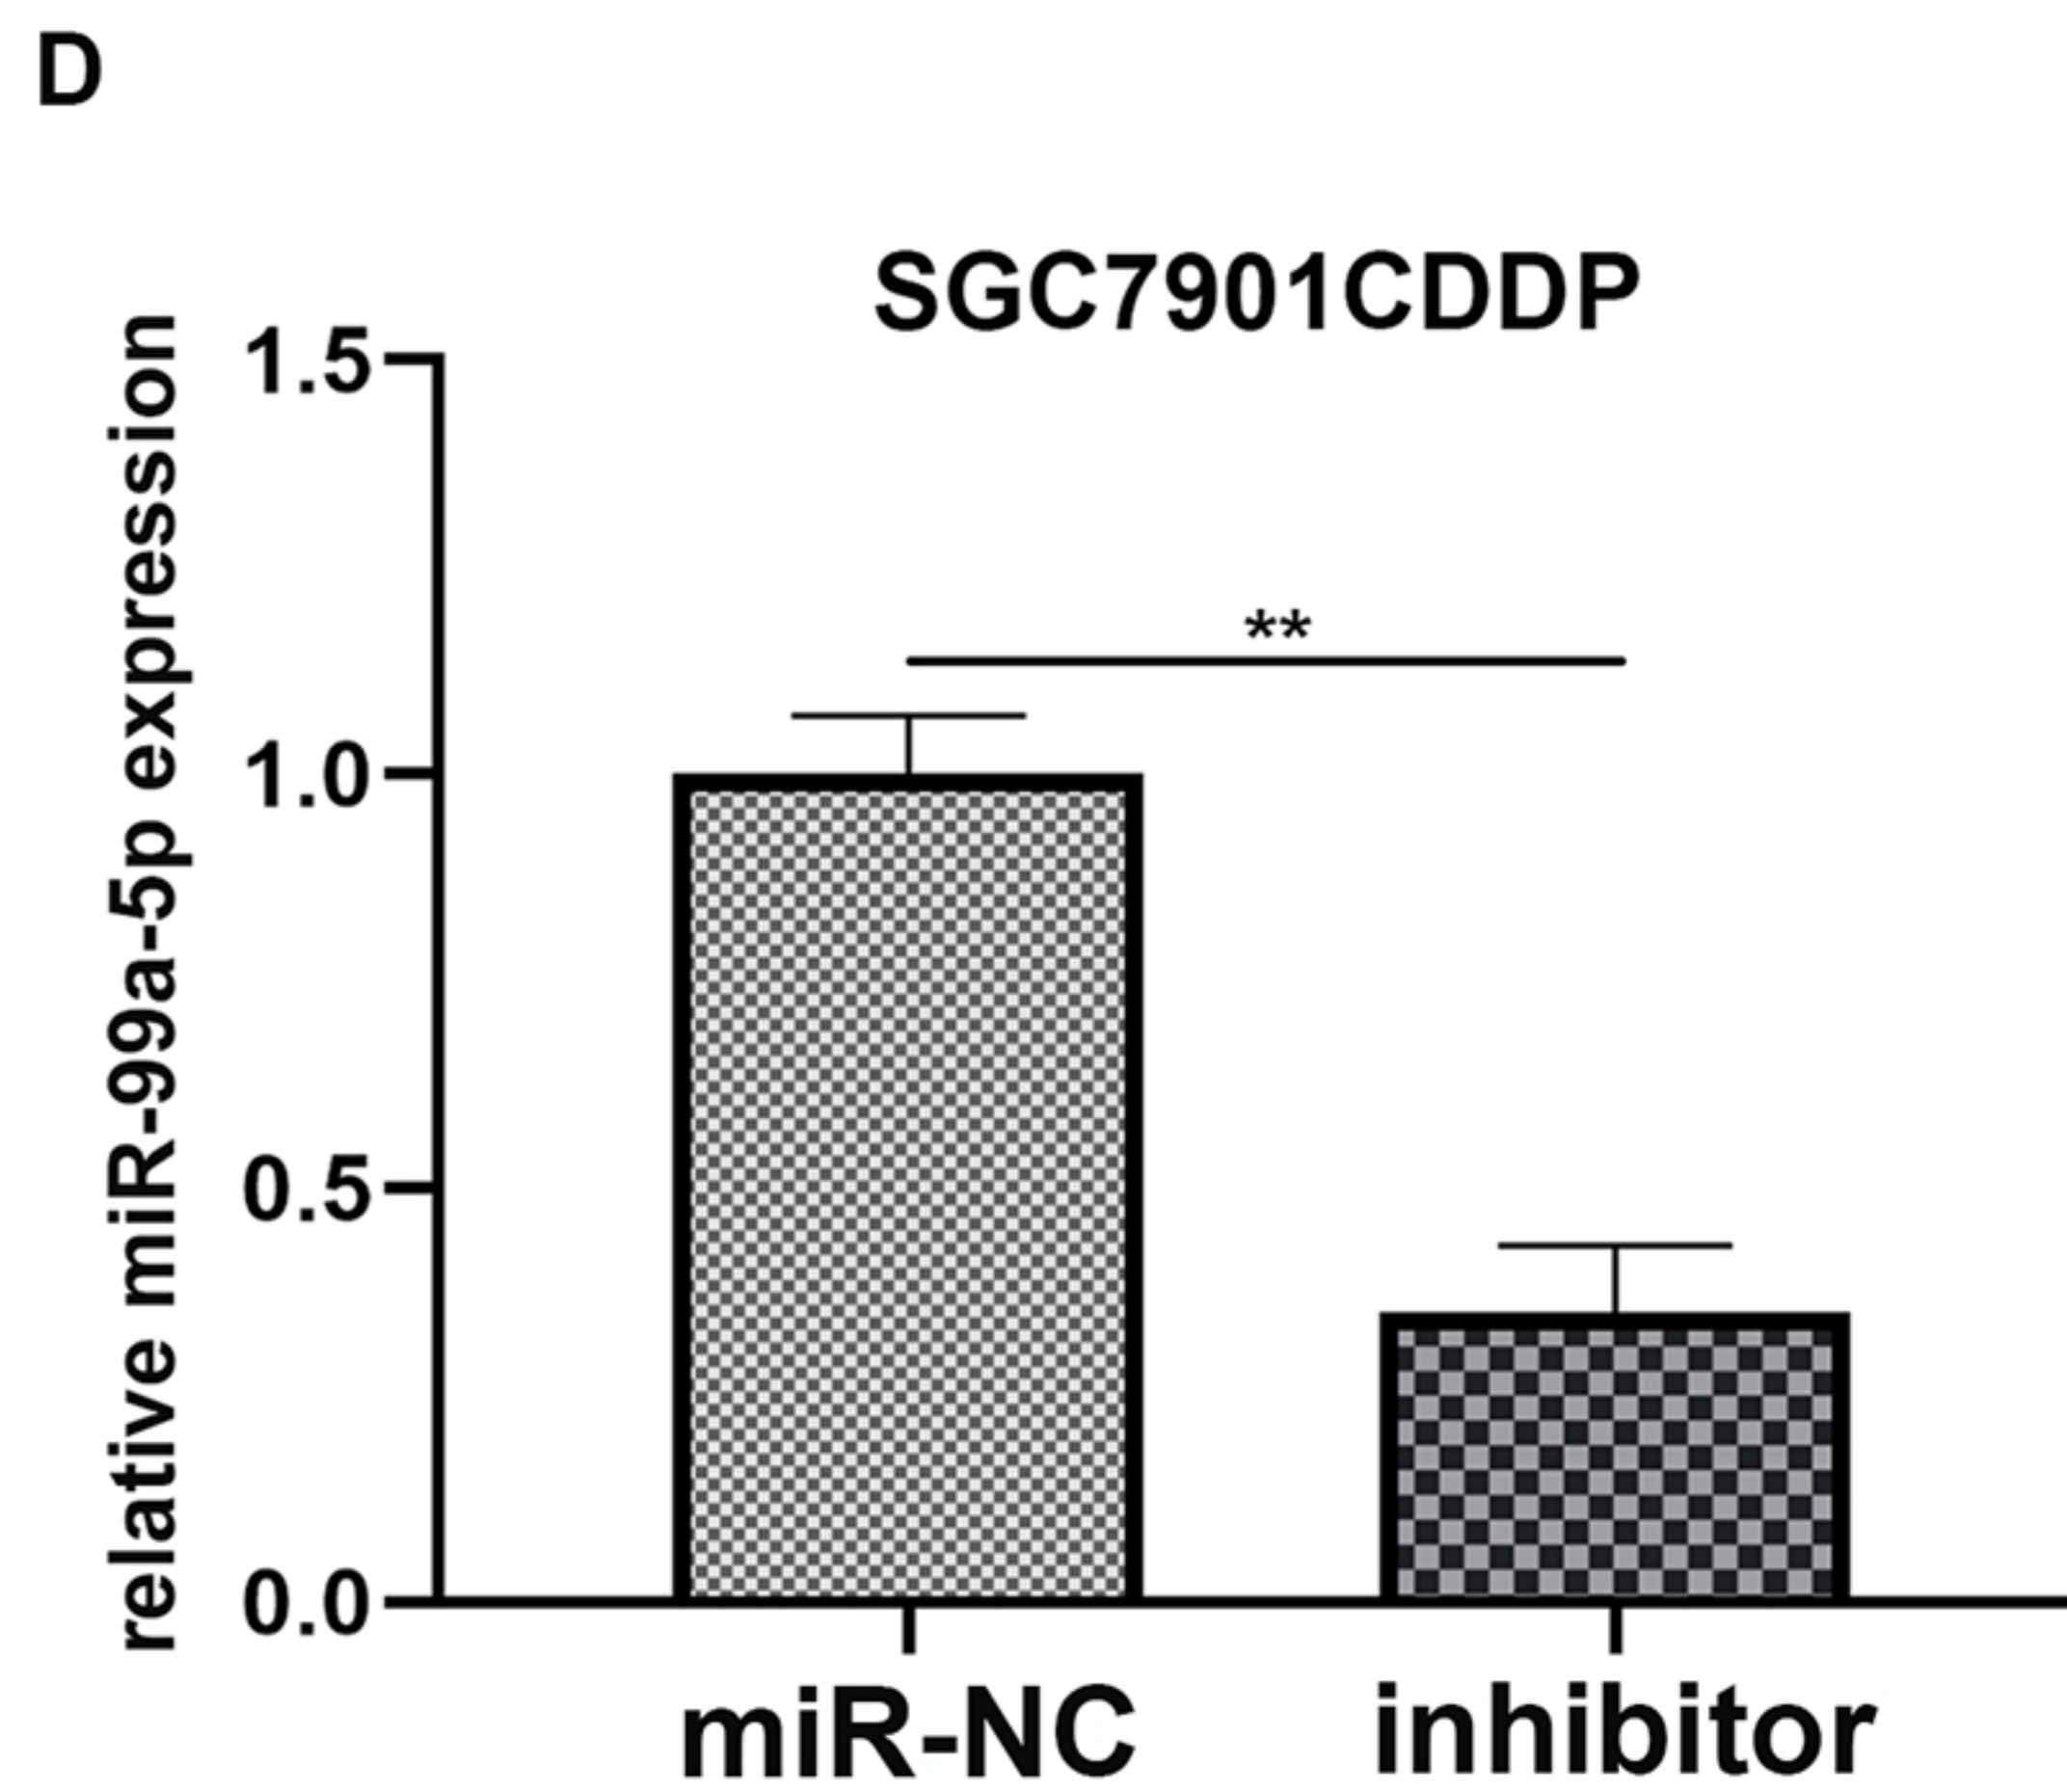

Supplement: 13046_2020_1758_MOESM3_ESM.pdf [file 13046_2020_1758_MOESM3_ESM.pdf]
